# Supplementary material for: Changes in macrobenthos communities during the invasive Spartina alterniflora removal and mangrove restoration
Source: Frontiers journal article supplement (doi:10.3389/fmars.2025.1581442), 2025-04-29
Supplement: Data_Sheet_1.pdf [file Data_Sheet_1.pdf]

# **Changes in macrobenthos communities during the invasive *Spartina alterniflora* removal and mangrove restoration**

Lin Lin <sup>a</sup>, Yuqing Guo <sup>a</sup>, Guanzhao Wang <sup>a</sup>, Shilong Feng <sup>a</sup>, Kai Liu <sup>a</sup>, Mingcheng Hu <sup>a</sup>, Mouxin Ye <sup>b</sup>, Chunxi Cao <sup>b</sup>, Ruohai Chen <sup>c</sup>, Silong Ding <sup>c</sup>, Zenghui Peng <sup>d</sup>, Fenfen Ji <sup>a\*</sup>, Yi-Jia Shih <sup>e\*</sup>

<sup>a</sup> *Fisheries College, Jimei University, Xiamen 361021, China*

<sup>b</sup> *Mangrove Conservation Foundation, Shenzhen, Guangdong, China*

<sup>c</sup> *Quanzhou Bay Estuary Wetland Nature Reserve Development Center, Quanzhou, Fujian, China*

<sup>d</sup> *Hunan Shuitiandi Environmental Technology Co., Ltd., Changsha 410205, China*

<sup>e</sup> *Sustainable Ocean Governance Centre, National Sun Yat-sen University, Kaohsiung 80424, Taiwan*

\* Corresponding author.

E-mail address: [ffji1213266226@163.com](mailto:ffji1213266226@163.com) (F. Ji); [cja0313@mail.nsysu.edu.tw](mailto:cja0313@mail.nsysu.edu.tw) (YJ SHIH).

Table S1 the number of OTU sequences obtained through eDNA metabarcoding

| Month   | The number of sequences |
|---------|-------------------------|
| 2022.9  | 57886                   |
| 2022.10 | 37299                   |
| 2022.12 | 56975                   |

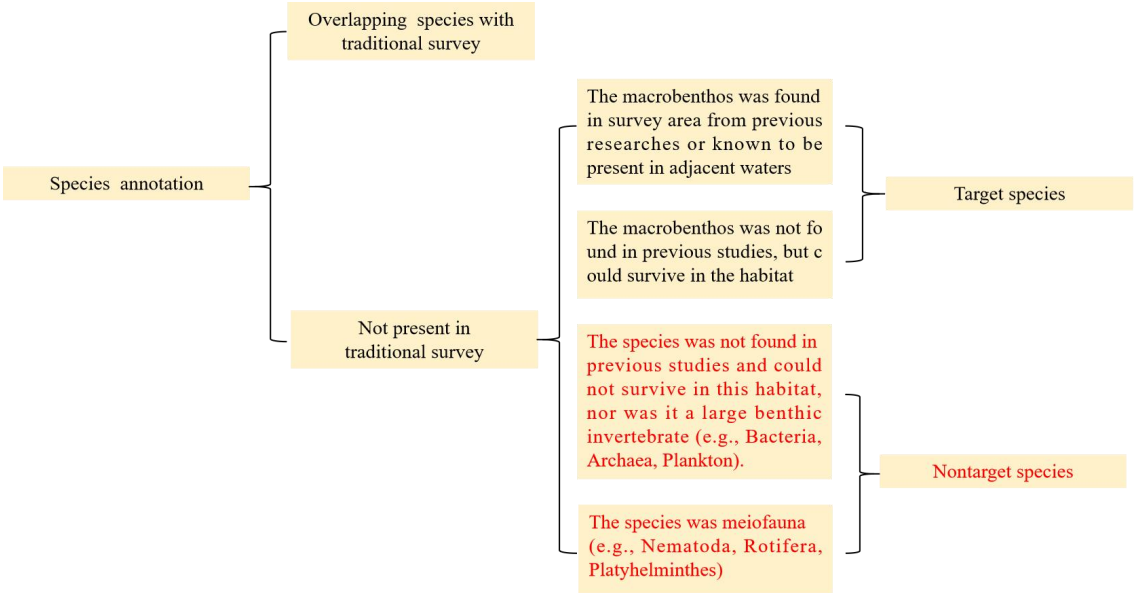

Figure S1 the species-filtering steps to identify target species

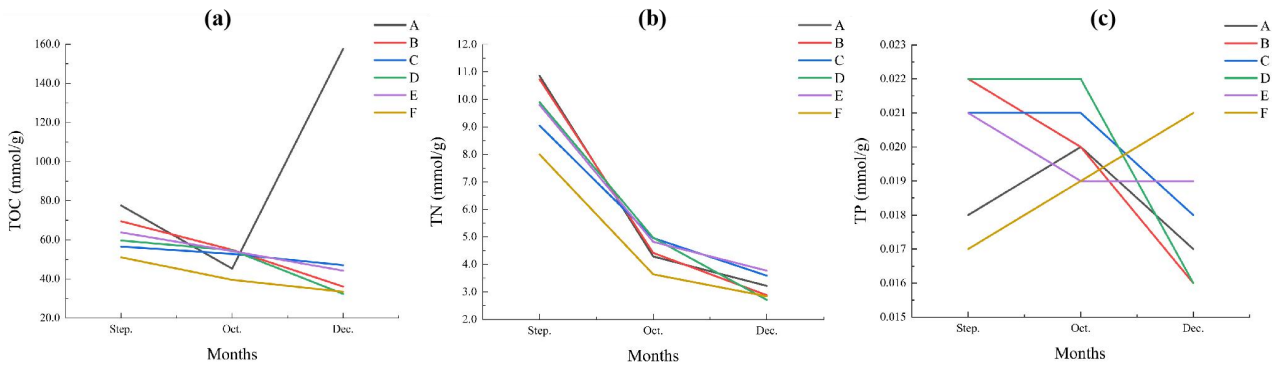

Figure S2 the changes in sediment environmental factors (TOC, TN and TP)
